# 1 Contribution of segment 3 to the 2 acquisition of virulence in contemporary 3 H9N2 avian influenza viruses

---

4 Running title: H9N2 PA mutations and virulence

5 Anabel L. Clements<sup>a,b</sup>, Joshua E. Sealy<sup>a</sup>, Thomas P. Peacock<sup>a,c</sup>, Jean-Remy Sadeyen<sup>a</sup>, Saira  
6 Hussain<sup>b,\*</sup>, Samantha J. Lycett<sup>b</sup>, Holly Shelton<sup>a</sup>, Paul Digard<sup>b</sup>, and Munir Iqbal<sup>a#</sup>

7 <sup>a</sup>The Pirbright Institute, Pirbright, Woking, UK, GU24 0NF.

8 <sup>b</sup>The Roslin Institute and Royal (Dick) School of Veterinary Studies, University of  
9 Edinburgh, Edinburgh, UK, EH25 9RG

10 <sup>c</sup>Department of Infectious Diseases, Imperial College London, UK, W2 1PG

11 \*Current address: The Francis Crick Institute, London, UK, NW1 1AT

12 #Corresponding author: Munir Iqbal, [Munir.iqbal@pirbright.ac.uk](mailto:Munir.iqbal@pirbright.ac.uk)

13

14

15

16

17        **Abstract**

18            H9N2 avian influenza viruses circulate in poultry throughout much of Asia, the Middle  
19 East and Africa. These viruses cause huge economic damage to poultry production systems  
20 and pose a zoonotic threat both in their own right as well as in the generation of novel  
21 zoonotic viruses, for example H7N9. In recent years it has been observed that H9N2 viruses  
22 have further adapted to poultry, becoming more highly transmissible and causing higher  
23 morbidity and mortality. Here, we investigate the molecular basis for this increased virulence,  
24 comparing a virus from the 1990s and a contemporary field strain. The modern virus  
25 replicated to higher titres in various systems and this difference mapped to a single amino  
26 acid polymorphism at position 26 of the endonuclease domain shared by the PA and PA-X  
27 proteins. This change was responsible for the virulent phenotype and extended tissue tropism  
28 seen in chickens. Although the PA K26E change correlated with increased host cell shutoff  
29 activity of the PA-X protein *in vitro*, it could not be overridden by frameshift site mutations  
30 that block PA-X expression and therefore increased PA-X activity could not explain the  
31 differences in replication phenotype. Instead, this indicates these differences are due to  
32 subtle effects on PA function. This work gives insight into the ongoing evolution and poultry  
33 adaptation of H9N2 and other avian influenza viruses and helps us understand the soaring  
34 morbidity and mortality rates in the field, as well as rapidly expanding geographical range  
35 seen in these viruses.

36

## 37 **Author Summary**

38 Avian influenza viruses, such as H9N2, cause huge economic damage to poultry  
39 production worldwide and are additionally considered potential pandemic threats.  
40 Understanding how these viruses evolve in their natural hosts is key to effective control  
41 strategies. In the Middle East and South Asia an older H9N2 virus strain has been replaced by  
42 a new reassortant strain with greater fitness. Here we take representative viruses and  
43 investigate the genetic basis for this ‘fitness’. A single mutation in the virus was responsible  
44 for greater fitness, enabling high growth of the contemporary H9N2 virus in cells, as well as  
45 in chickens. The genetic mutation that modulates this change is within the viral PA protein, a  
46 part of the virus polymerase gene that contributes in viral replication as well as contribute in  
47 the virus accessory functions – however we find that the fitness effect is specifically due to  
48 changes in the protein polymerase activity.

49

## 50 **Introduction**

51 Influenza A viruses possess a segmented, negative-sense RNA genome which is  
52 transcribed and replicated by a tripartite RNA-dependent RNA polymerase (RdRp) composed  
53 of the subunits PB2, PB1 and PA. Due to the segmented nature of its genome, influenza  
54 viruses can readily swap genes when two virus strains co-infect a single cell, in a process  
55 known as reassortment. Reassortment can result in generation of viruses with increased [1]  
56 or reduced viral fitness [2].

57 H9N2 avian influenza viruses (AIVs) are low pathogenicity avian influenza (LPAI) viruses  
58 that are enzootic in poultry in many countries across Asia, Africa and the Middle East [3-6]. In  
59 afflicted countries they cause a constant burden on poultry production systems through  
60 mortality often associated with co-infection, or morbidity that leads to reduced egg  
61 production and bird growth rates [7-9]. They also pose a zoonotic risk as evidenced by over  
62 60 confirmed cases of human infection, with over half of those occurring since 2015 [6] .

63 Due to their extensive geographical range H9N2 AIVs often co-circulate with other AIV  
64 subtypes resulting in frequent reassortment events [10]. Several viruses have emerged in  
65 recent years which contain the internal gene cassette derived from H9N2 AIVs including a  
66 novel avian-origin H7N9 virus which has caused human infections in China. H7N9 possesses  
67 the polymerase genes from an enzootic co-circulating H9N2 strain [11, 12]. Novel genotypes  
68 of H9N2 AIV have also emerged in poultry due to co-circulation and reassortment with local  
69 highly pathogenic avian influenza virus strains; we have previously described G1-lineage H9N2  
70 viruses in Pakistan that possess the NS gene segments from H7N3 or H5N1 strains and the  
71 polymerase genes from other Indian/Middle East lineage H9N2 viruses [13]. These  
72 reassortants have replaced previously circulating genotypes of the G1-lineage H9N2 AIVs, and  
73 are now the predominant genotype across the Indian subcontinent and Middle East, and  
74 display enhanced morbidity and mortality in the field [14-16].

75 The molecular basis for the increased pathogenicity of contemporary reassortant H9N2  
76 AIVs has yet to be established. Thus, we set out to understand which genes are responsible  
77 for the enhanced virulence of these H9N2 viruses in poultry. We created a panel of reverse  
78 genetics reassortants between a pair of G1-lineage viruses A/guinea fowl/Hong  
79 Kong/WF10/1999 (WF10), a virus representing G1-lineage viruses circulating in the late

80 1990s, and A/chicken/Pakistan/UDL-01/2008 (UDL-01), representative of novel G1-lineage  
81 reassortant H9N2 viruses. UDL-01 contains the HA, NA, NP and M genes related to previously  
82 circulating enzootic G1-lineage H9N2 viruses in the region, the polymerase gene cassette from  
83 different G1-lineage H9N2 viruses, more predominant in the Middle East, and the NS gene  
84 segments from an HPAIV H7N3 [13].

85 In this study we find that the ancestral virus WF10, showed an attenuated replication  
86 phenotype *in vitro* when compared to the contemporary H9N2 virus, UDL-01. This phenotypic  
87 difference mapped to a single amino-acid residue in the PA endonuclease domain (position  
88 26) within segment 3. This single residue also determined the replicative fitness and virulence  
89 of the virus *in vivo*, and was further shown to modulate the activity of PA in a PA-X  
90 independent manner.

## 91 **Results**

### 92 **Differences in plaque phenotype between two H9N2 AIV strains maps to the N-** 93 **terminal half of segment 3**

94 We generated a panel of reciprocal reassortant viruses between the full reverse genetics  
95 systems of WF10, a virus representing G1-lineage H9N2 AIVs that circulated in the late 1990s,  
96 and UDL-01, representative of a novel reassortant G1-lineage H9N2 with genes from several  
97 previously enzootic G1-lineage H9N2 viruses and HPAIV H7N3 viruses. Wild-type (WT) WF10  
98 virus generated small hazy plaques in MDCK cells whereas WT UDL-01 generated significantly  
99 larger, clearer plaques (Figure 1A, B). We tested the plaque phenotype of all reassortants and  
100 identified segment 3 as capable of reciprocating plaque phenotype between WF10 and UDL-  
101 01 (Figure 1A, B; data for non-segment 3 reassortants not shown). UDL-01 virus containing

102 segment 3 of WF10 presented significantly smaller plaques, while reassortant WF10  
103 presented significantly larger plaques, relative to WT viruses (Figure 1A, B).

104 To identify the region of segment 3 responsible for this alteration, two chimeric segments  
105 3s were generated by Gibson assembly: one chimera encoded the N-terminus (amino acids 1-  
106 367) from PA of UDL-01 and the C-terminus (amino acids 368-716) of WF10 (U/W), while the  
107 other was *vice versa* (W/U). These chimeric segments were rescued by reverse genetics in the  
108 background of UDL-01 and WF10 viruses. Determination of the plaque phenotypes showed  
109 that, regardless of the rest of the virus genes, viruses containing a UDL-01 PA N-terminal  
110 coding region had significantly larger plaques than those without (Figure 1B, C). Furthermore,  
111 UDL-01 virus, which typically presents a large plaque phenotype, presented significantly  
112 smaller plaques when given a WF10 N-terminus (Figure 1B, C). These results show that the  
113 small plaque phenotype could be mapped specifically to the N-terminal half of WF10 PA.

#### 114 **Amino acid residue 26 in PA modulates plaque phenotype**

115 PA is composed of two major domains, an N-terminal endonuclease (endo) domain and  
116 a C-terminal domain (PA-C) connected by a linker region [17]. The PA endo domain is a flexible  
117 appendage that hangs away from the catalytic core of the RdRp and is involved in cleaving  
118 host capped RNAs to be fed into the RdRp active site to be used as primers for viral transcription.  
119 The PA-C domain is packed close to PB1 and makes up part of the catalytic core of the viral  
120 RdRp [18].

121 The first 191 amino acids of PA, incorporating the endo domain, are also shared with the  
122 accessory protein PA-X. PA-X is expressed due to a ribosomal frame shift site in PA, during  
123 segment 3 translation a small proportion of ribosomes, when encountering a rare tRNA codon

124 slip into the +2 open reading frame (ORF) of segment 3 and express a fusion protein  
125 comprised of the PA endo domain and an X-ORF from the +2 reading frame [19, 20]. PA-X  
126 dampens the innate immune response through its host cell shutoff activity, mediated through  
127 degradation of cellular mRNAs and disruption of mRNA processing machinery [19, 21]. The  
128 evidence for PA-X playing a role as a virulence factor in avian influenza viruses is unclear, with  
129 several studies showing either attenuation or promotion of virulence *in vivo* [22-26].

130 To identify amino acid substitutions responsible for modulating virus plaque phenotype,  
131 we compared amino acids in the N-terminal half of PA between UDL-01 and WF10, as well as  
132 between the X-ORFs of PA-X. We identified a total of twenty amino acid differences between  
133 PA and 2 unique to the X-ORF (Table 1). Mapping the residues onto the crystal structure of  
134 influenza PA within the context of the polymerase trimer bound to vRNA showed that they  
135 lay in the PA-endo domain, the linker region and at the N-terminus of the PA-C domain [27]  
136 (Figure 1D, Table 1). This enabled us to speculate if any of the substitutions had a direct effect  
137 due to their proximity to known functional regions. Substitution I118T is specifically located  
138 within the endonuclease active site, while A20T, E26K and I100V/D101E lie proximal to the  
139 active site and could potentially interfere with endonuclease activity. Therefore, these  
140 mutations, alongside the X-ORF polymorphisms and several other mutants at residues shown  
141 previously to modulate polymerase activity [28], were selected for further testing.

142 A panel of viruses was made carrying reciprocal single amino acid substitutions at the  
143 sites identified and viruses were rescued using reverse genetics. Within the UDL-01 panel of  
144 PA mutant viruses, two mutants gave significantly smaller plaque sizes than UDL-01 WT: the  
145 E26K mutant produced comparably-sized plaques to that of the WF10 WT virus (Figure  
146 2A,B,C), while the double mutant I100V/E101D also had a small plaque phenotype, though

147 less markedly so than E26K (Figure 2C). Within the WF10 panel of viruses, the most striking  
148 visual difference was caused by the introduction of K26E, which facilitated significant larger  
149 plaque diameters (Figure 2B, C). D316G also gave a heterogenous but significantly larger  
150 average plaque size than WT WF10. Mutations at position 26 were the only viruses to give  
151 reciprocal plaque size phenotypes in both viral backgrounds, strongly suggesting that this  
152 position is key to the phenotype.

### 153 **Residue 26 in PA modulates virus replication kinetics**

154 For influenza viruses, small plaque phenotypes are often used as a marker of poor virus  
155 replication, thus we further investigated this phenotype by performing multiple cycle  
156 replication kinetics experiments with the position 26 mutants.

157 In MDCK cells infected at a low MOI, by later time points (36 hours and after) UDL-01 WT  
158 clearly grew to higher titres than WF10 WT, consistent with the plaque assay phenotypes  
159 (Figure 3A). UDL-01 E26K showed slightly attenuated growth compared to UDL-01 WT while  
160 WF10 K26E showed slightly enhanced titres compared to WT WF10, which were significantly  
161 different at the 48 and 72 hour time points (Figure 3A). Thus, PA residue 26 had significant  
162 reciprocal effects on the replication of UDL-01 and WF10 viruses in MDCK cells, recapitulating  
163 the differences seen for the MDCK plaque size phenotype.

164 To test if the effect of PA residue 26 amino acid substitutions held true in more  
165 biologically relevant avian systems, viral replication kinetics were assessed in primary chicken  
166 kidney (CK) cells and embryonated chicken eggs (Figure 3B, C). In CK cells there were  
167 consistent differences between the replication kinetics of the viruses similar to that seen in  
168 MDCKs; viruses with PA 26E (UDL-01 WT and WF10 K26E) reached peak titres at 24 hours



169 post-infection, while 26K-containing viruses replicated at a slower rate, achieving maximum  
170 titres at 48 and 72 hour time points (Figure 3B). UDL-01 E26K trended towards lower titres  
171 than UDL-01 WT, which was significant at 24 hours post-infection. Likewise, WF10 K26E  
172 generally showed enhanced titres compared to WF10 WT, which was significant at 8 hours  
173 post-infection.

174 In embryonated eggs, as in MDCK cells and CK cells, UDL-01 E26K showed attenuated  
175 growth compared to UDL-01 WT, significantly so at 12 and 24 hours post-infection, while  
176 WF10 K26E showed enhanced growth compared to WF10 WT, significantly at 12 hours post-  
177 infection (Figure 3C). Considering these data together, we can conclude that amino acid  
178 substitutions at position 26 of PA within WF10 and UDL-01 H9N2 AIVs significantly altered the  
179 replication of the viruses in both mammalian cell lines, and avian systems indicating this  
180 attenuation is not host-dependent.

### 181 **Impact of PA amino acid substitutions on polymerase activity**

182 As an integral part of the trimeric polymerase, influenza PA mutations have previously  
183 been shown to impact polymerase activity due to its position within the heterotrimeric  
184 polymerase complex (*e.g.* [29]). To investigate the role of K26E, as well as the other mutations  
185 tested here on polymerase activity, minireplicon assays were performed in chicken DF-1 cells.  
186 Cells were transfected with expression plasmids for either the UDL-01 or WF10 polymerase  
187 components plus NP and a vRNA-reporter encoding luciferase under the control of the avian  
188 RNA polymerase I promoter. No significant differences were seen between the activities of  
189 polymerase complexes containing UDL-01 or WF10 WT polymerases (Figure 3D). However, in  
190 contrast to the virus replication assays, UDL-01 E26K showed a small (~ 2-fold) but significant  
191 increase in polymerase activity compared to UDL-01 WT. There were no further significant

192 differences seen with any of the UDL-01 or WF10 mutants when compared to the activity of  
193 the relevant WT control, including the reciprocal K26E change in WF10. Polymerase activity  
194 was also measured in mammalian 293T cells but no significant differences were seen (data  
195 not shown). These data suggest that the differences in plaque phenotype observed between  
196 WF10 (progenitor) and UDL-01 (reassortant) H9N2 AIVs was not unambiguously related to  
197 the segment 3s ability to support polymerase activity alone..

### 198 **PA-E26K attenuates virus replication and pathogenicity *in vivo***

199 The WF10-like K26E mutation appears to lead to an attenuated replication phenotype  
200 for UDL-01 *in vitro*, *ex vivo* and *in ovo*, therefore we decided to assess the ability of UDL-01  
201 E26K within the natural chicken host. Two groups of chickens were inoculated with either  
202 UDL-01 WT or UDL-01 E26K virus and viral shedding, transmissibility, tissue tropism and  
203 clinical signs were assessed. In both infected groups all directly inoculated birds shed virus  
204 robustly into the buccal cavity, peaking early in infection (day 1 or 2) and then declining over  
205 the subsequent days (Figure 4A). However, the UDL-01 E26K virus was shed in significantly  
206 lower amounts and was cleared sooner; no swabs were found positive for infectious virus by  
207 day 5 in the E26K group compared to day 7 for the WT group (Figure 4A). When the area  
208 under the shedding curves (AUC) were calculated to assess the total virus shed throughout  
209 the study period, birds directly infected with UDL-01 WT virus showed almost a ten-fold  
210 increased AUC compared to birds infected with the mutant UDL-01 E26K virus (215,517 versus  
211 23,886). Therefore, the mutant UDL-01 E26K virus showed a reduced total shedding  
212 throughout the study by birds directly infected with virus.

213 Contact birds were introduced into each group 1 day post-inoculation. All contact birds  
214 in both groups tested positive for infectious virus from the buccal cavity by 1 day post-

215 exposure indicating robust contact transmission for both viruses (Figure 4B). A significant  
216 reduction in buccal shedding was seen in contact birds exposed to UDL-01 E26K compared to  
217 UDL-01 WT from day 1 through to 4 post-exposure; however, the delayed clearance of the  
218 mutant virus was not seen in the contact bird group, with both groups of birds clearing virus  
219 by day 6 post-exposure and similar levels of virus being shed on day five post-exposure (Figure  
220 4B). When the AUC was calculated to assess the total virus shed throughout the study period,  
221 contact birds infected with UDL-01 WT virus again showed around a ten-fold greater AUC  
222 compared to birds infected with the mutant UDL-01 E26K virus (187,915 versus 17,367).

223 Cloacal swabs from directly infected and contact birds were also analysed, shedding was  
224 sporadic with not all birds yielding detectable infectious virus (data not shown). In total, six  
225 UDL-01 WT and five E26K directly infected birds shed detectable virus along with a single  
226 contact bird from each group. More birds shed virus on consecutive days in the WT group  
227 than the E26K group (4 birds versus 1). This sporadic and low level virus shedding is commonly  
228 seen for some AIV subtypes including the UDL-01 virus [30-33].

229 Clinical signs throughout the study were generally mild and the majority of birds showed  
230 diarrhoea with depression as expected from previous reports of H9N2 infection, including  
231 UDL-01 H9N2 [30, 33]. However, between days three to six post-inoculation 33% of birds (30%  
232 directly infected and 37.5% of contact birds) within the UDL-01 WT infected group died (either  
233 spontaneously or due to reaching humane end points and being culled) despite UDL-01 being  
234 classified as a LPAIV (Figure 4C); analysis of these survival curves showed a statistically  
235 significant difference ( $p < 0.0001$ ). UDL-01 has previously shown to cause high levels or  
236 morbidity as well as occasionally low levels of mortality in experimentally infected animals of

237 certain chicken lines [30, 33]. Birds infected with mutant UDL-01 E26K showed no mortality,  
238 indicating this single mutation clearly attenuates the virus for pathogenicity and mortality.

239

#### 240 **Tropism of virus in infected chickens**

241 To determine whether the UDL-01 E26K mutation lead to any alteration in tropism,  
242 tissues were taken from directly infected birds on days 1 and 3 post-inoculation. RNA  
243 extracted from tissue samples was used for qRT-PCR reactions to detect the viral M gene  
244 vRNA as a marker for presence of virus within tissues; which we have previously shown  
245 correlates well with tissue infectious virus titres [30]. At both time points, M gene copy  
246 number was highest in the nasal and tracheal tissues but was also readily detectable within  
247 the lung, colon, kidney, and spleen and intermittently detected in the liver (at least within  
248 UDL-01 WT infected birds; Figure 4D, E). Overall, RNA copies were variable between days, and  
249 between different birds, but levels were highest on day 3 post-inoculation, particularly within  
250 the visceral organs. Within these animals, UDL-01 WT virus was consistently present at higher  
251 levels in a number of tissues compared to birds infected with the mutant UDL-01 E26K virus.  
252 On day 1 post-inoculation there was significantly higher levels of RNA within the lung, kidney,  
253 spleen and liver of the UDL-01 WT, compared to UDL-01 E26K infected birds (Figure 4D). On  
254 day 3, UDL-01 E26K mutant virus was mostly undetectable in the visceral organs, but  
255 detectable within the nasal tissue where levels remained high ( $10^4$  to  $10^5$  copies of viral M  
256 gene). The lung, colon and kidneys also showed significantly higher levels of UDL-01 WT RNA  
257 compared to the mutant UDL-01 E26K (Figure 4E). This suggested that although the UDL-01  
258 E26K virus was able replicate efficiently in the upper respiratory tract, it was less able to

259 disseminate through the bird and was more rapidly cleared. The expanded visceral tropism of  
260 the UDL-01 WT virus likely explains its highly mortality observed in this experimental study.

261

## 262 **Polymorphisms at position 26 affect the host shutoff activity of the accessory protein**

### 263 **PA-X**

264 As we observed little or no difference in polymerase activity with the reciprocal mutants  
265 at position 26 we hypothesized that the difference in replication could be due to WF10 having  
266 poor PA-X activity. To test this, a previously described  $\beta$ -galactosidase ( $\beta$ -gal) reporter assay  
267 was used to test the ability of the PA-X proteins from these viruses to cause host cell shutoff  
268 [19, 34]. Briefly, cells were co-transfected with expression plasmids containing the different  
269 segment 3s along with a  $\beta$ -gal reporter plasmid, followed by enzymatic readout of  $\beta$ -gal  
270 activity to give a measure of host gene expression in the transfected cells and thus the ability  
271 of the different segment 3 plasmids to cause host shutoff. Previous work has suggested that  
272 the majority of influenza host cell shutoff comes from expression of PA-X rather than PA [19,  
273 34, 35].

274 Mammalian 293T cells were transfected with plasmids with or without mutations in the  
275 shared PA/PA-X endo domain or PA-X X-ORF and  $\beta$ -gal activity was measured. All data were  
276 normalized to a control where segment 3 was substituted for an empty vector. UDL-01 WT  
277 segment 3 significantly reduced levels of  $\beta$ -gal compared to the empty vector control  
278 indicating robust shutoff activity (Figure 5A), as shown previously [34]. In contrast WF10 WT  
279 segment 3 displayed no detectable shutoff, giving equivalent  $\beta$ -gal signal to the empty vector  
280 control. When the reciprocal mutants were tested, only mutations at position 26 had a

281 reciprocal effect, significantly removing shutoff activity in a UDL-01 background and causing  
282 shutoff activity in the WF10 background. In the UDL-01 background I118T additionally showed  
283 significantly reduced shutoff activity but a reciprocal effect was not seen in WF10. In the WF10  
284 background the X-ORF mutation X-L221R also significantly increased host shutoff activity. All  
285 other mutations showed the same phenotypes as their respective WT segment 3s.

286 The host shutoff assay was also performed in avian DF-1 cells for the mutants at positions  
287 26, 118 and X-221 (Figure 5B). Although not significant, the change at position 26 trended  
288 towards switching the two segment 3s phenotypes – removing shutoff activity from UDL-01  
289 and introducing the activity into WF10 segment 3. Again UDL-01 I118T removed shutoff  
290 activity and WF10 X-L221R partially introduced shutoff activity, but as in 293Ts, these effects  
291 were not seen reciprocally.

292 To assess shutoff activity further, in the context of viral infection rather than transfection  
293 and overexpression, we performed both radioactive and non-radioactive metabolic labelling  
294 experiments. To test the shutoff activity in avian cells, primary chicken embryonic fibroblast  
295 (CEF) cells were infected with a high MOI of virus containing mutations in segment 3 and were  
296 subsequently pulsed with <sup>35</sup>S methionine then lysed and run on SDS-PAGE. Autoradiography  
297 was performed and densitometry used to measure the abundance of the highly abundant  
298 host protein, actin. In accordance with the reporter assays, UDL-01 WT virus showed efficient  
299 host shutoff with <10% of the levels of actin expressed in the mock infected cells, whereas  
300 WF10 WT virus resulted in poor shutoff activity (>50% actin expressed versus mock; Figure  
301 5C, D). Reciprocal mutants at position 26 were the only mutants tested that showed any  
302 significant effect; UDL-01 E26K showed significantly poorer host shutoff while WF10 K26E  
303 showed significantly more robust shutoff. Finally, a similar experiment was performed in

304 MDCK cells using the non-radioactive method of puromycin pulsing and looking for levels of  
305 puromycinylated proteins in cell lysates [36]. MDCKs were either infected with WT viruses or  
306 the position 26 mutants. Levels of puromycinylated products were then detected by western  
307 blot and quantified in the ~ 50 – 80 kDa range, where no novel products likely corresponding  
308 to viral polypeptides were visible. As with the previous assays, UDL-01 WT gave robust shutoff  
309 while WF10 WT gave poor shutoff which could be switched, significantly, upon the  
310 introduction of the reciprocal mutations at position 26 (Figure 5E, F).

311 Overall, these results show that UDL-01 has a PA-X capable of causing robust host shutoff  
312 in avian and mammalian cells while WF10 does not, and the reason for this difference maps  
313 to the identity of the amino acid at position 26.

#### 314 **Differences in PA-X alone are not responsible for the attenuation of WF10 compared** 315 **to UDL-01**

316 The changes at PA position 26 are responsible for attenuation of WF10 *in vitro* and *in*  
317 *vivo*; these correlated better with the *in vitro* host cell shutoff activity of PA-X than with  
318 polymerase activity. To investigate whether the E26K polymorphism exerted its *in vivo*  
319 phenotypic effect via PA-X rather than through PA, we introduced a well characterized set of  
320 nucleotide substitutions into the frameshift site (FS mutant) of PA which has previously been  
321 shown to inhibit expression of PA-X [19, 34, 35]. We further combined this FS mutation with  
322 the reciprocal mutants at position 26.

323 We initially investigated the combined effect of position 26 and FS mutations on host  
324 shutoff in mammalian and avian cells (Figure 6A,B). For UDL-01 WT introduction of either the  
325 E26K or FS mutation individually or together ablated shutoff activity, indicating as we and

326 others have shown, that segment 3 shutoff activity maps to PA-X [19, 34, 35, 37, 38].  
327 Conversely, as WF10 WT segment 3 had no shutoff activity the FS mutant alone had no  
328 additional effect but ablated the increased shutoff activity seen when combined with WF10  
329 K26E. An identical outcome of the mutations was observed in avian cells (Figure 6B). Finally,  
330 using whole viruses with both mutations at position 26 and FS combined we showed that  
331 when PA-X expression was ablated in both viruses, shutoff activity (as assayed by puromycin  
332 incorporation) was lost (Figure 6C). Overall, these data indicate the shutoff activity of segment  
333 3s that contain PA 26E is entirely dependent on PA-X expression.

334 We next tested whether the difference in plaque and replication phenotype also mapped  
335 to PA-X and whether the differences seen previously in this study were sensitive to removal  
336 of PA-X expression. Looking at the plaque phenotypes of these combined mutants we saw the  
337 frameshift mutant had little or no effect on the reciprocal plaque sizes seen in the viruses;  
338 although the UDL-01 E26K + FS mutant had a significantly smaller plaque size than UDL-01  
339 WT, the WF10 K26E + FS virus retained its large plaque size, despite a lack of PA-X expression  
340 and shutoff activity (Figure 6D, E). Furthermore, the replication kinetics of the combined  
341 mutant viruses exhibited a similar phenotype – WF10 K26E + FS grew to higher titres than  
342 WF10 WT, indicating again that the enhanced replication conferred by the PA K26E mutation  
343 was independent of PA-X expression and shutoff activity (Figure 6F). Overall this implies that  
344 the difference in virus replication, and potentially pathogenicity, seen in viruses with  
345 differences at segment 3 position 26, may partially or fully map to PA, rather than PA-X alone.



## 346 Discussion

347 In this study we investigated how differences in the PA gene of a progenitor (WF10) and  
348 a contemporary reassortant (UDL-01) H9N2 viruses led to differences in replicative fitness.  
349 We mapped these differences to a single PA residue at position 26, which is within the  
350 endonuclease domain. Although changes at this residue did not affect virus polymerase  
351 activity, they did cause reciprocal differences in replicative fitness in both mammalian and  
352 avian systems, in cell lines, primary cells, embryonated eggs, as well as *in vivo*, in chickens.  
353 We found that although these mutations strongly affected the shutoff activity of the  
354 accessory protein PA-X, this did not explain the differences in *in vitro* virus replication  
355 phenotype, indicating that it is likely that differences in PA function are partially, or fully,  
356 responsible for this.

357 The influenza virus accessory protein, PA-X, has been described in multiple studies as a  
358 virulence factor in avian influenza viruses (including H9N2 viruses) that can affect disease  
359 outcome in mammals or birds [22, 24, 26, 34]. Although other studies have found PA-X  
360 expression can lead to an attenuated phenotype, particularly in highly pathogenic H5N1  
361 viruses [23, 25]. We found that differences between UDL-01 and WF10 at position 26 do  
362 modulate PA-X shutoff activity; however, PA-X activity alone was not responsible for the  
363 different replication phenotypes seen in these viruses, it is possible PA-X activity may still be  
364 contributing *in vivo* but that this effect is overshadowed by a dominant PA-specific replication  
365 effect. Although several further gene products are described as being generated from  
366 influenza A virus segment 3 (for example PA-N155 and PA-N182), these products do not share  
367 the PA endo domain and therefore are unlikely to explain the difference in phenotype  
368 between UDL-01 and WF10 [39].

369           The poor replication and small plaque phenotype of WF10 has been previously described  
370 by Wan and colleagues; the authors showed that the small plaque phenotype of WF10 could  
371 be overcome by supplying the virus with the internal genes of a human H3N2 virus [40]. In  
372 our study we further map these phenotypes to a single polymorphism in the PA gene at  
373 position 26. In a separate study by Obadan and colleagues, a WF10 mutant virus library with  
374 heterogeneity in the haemagglutinin receptor binding site was used to infect quails. It was  
375 found that PA-K26E, the UDL-01-like mutation, was consistently found to spontaneously arise  
376 – further suggesting that PA-K26 is responsible for the attenuated phenotype seen in WF10,  
377 both *in vitro* and *in vivo* [41].

378           Throughout this study it has been shown that PA residue 26 is responsible for the  
379 attenuated phenotype seen in WF10. When the relative distribution of polymorphisms at  
380 position 26 is looked at in the population of H9N2 viruses, or throughout avian influenza  
381 viruses in general, it becomes clear that the WF10-like K26 is very rare, with only a handful of  
382 viruses sharing any kind of polymorphism at this position. Over 99% of avian influenza viruses,  
383 including strains of the H5, H7 or H9 subtype contain the UDL-01-like E26 at this position, with  
384 a very few viruses containing lysine, glycine, aspartic acid or glutamine (Table 2).

385           Understanding the molecular basis of increased fitness of avian influenza viruses, both in  
386 avian and mammalian cells, as they continue to circulate and adapt to avian hosts is key to  
387 assessing the threat these viruses pose to food systems and to the human population. In this  
388 study we describe a single naturally occurring polymorphism in the endo domain of PA that  
389 leads to an attenuated replication and virulence phenotype. This work will help guide future  
390 surveillance efforts and may help us better understand the molecular basis of viral fitness and  
391 virulence in the avian host.

## 392 **Materials and Methods**

### 393 **Ethics Statement**

394 All animal experiments were carried out in strict accordance with the European and  
395 United Kingdom Home Office Regulations and the Animal (Scientific Procedures) Act 1986  
396 Amendment regulation 2012, under the authority of a United Kingdom Home Office Licence  
397 (Project License Numbers: P68D44CF4 X and PPL3002952).

### 398 **Cell lines**

399 Madin\_Darby canine kidney (MDCK) cells, Human embryonic kidney (HEK) 293T cells and  
400 chicken DF-1 cells were maintained in Dulbecco's Modified Eagle Medium (DMEM; Sigma)  
401 supplemented with 10% (v/v) FBS and 100U/ml Penicillin-Streptomycin (complete DMEM).  
402 All cells were grown at 37°C, 5% CO<sub>2</sub>.

403 Primary chicken kidney (CK) cells were generated as previously described [42]. Briefly,  
404 kidneys from three-week-old specific pathogen free (SPF) Rhode Island Red breed birds were  
405 shredded, washed in PBS, trypsinised, then filtered. Cells were resuspended in CK growth  
406 media (EMEM + 0.6% w/v BSA, 10% v/v tryptose phosphate broth, 300U/ml  
407 penicillin/streptomycin), plated and grown at 37°C, 5% CO<sub>2</sub>.

408 Primary chicken embryo fibroblasts (CEFs) were generated from 10-day-old chicken  
409 embryos. Embryos were homogenised and treated with trypsin/EDTA solution. Supernatants  
410 were passed through a metal mesh filter and centrifuged to pellet cells. Cells were  
411 resuspended in CEF media (M199, 4% (v/v) FBS and 100U/ml Pen/Strep), plated and grown at  
412 37°C, 5% CO<sub>2</sub>.

413 **Viruses and reverse genetics**

414 A pair of H9N2 viruses were used through this study, A/chicken/Pakistan/UDL-01/2008  
415 (UDL-01) and A/Guinea Fowl/Hong Kong/WF10/1999 (WF10). Both virus reverse genetics  
416 systems were created using the bi-directional PHW2000 plasmids [43, 44]. Mutant PA  
417 segments were generated by site directed mutagenesis or Gibson assembly (NEB).

418 Reverse genetics viruses were generated as previously described [43]. Briefly, 250ng of  
419 each plasmid for either UDL-01 and WF-10 viruses were co-transfected into 6 well plates of  
420 293Ts using lipofectamine 2000. 16h post transfection, media was changed to reverse  
421 genetics media (DMEM + 2mM glutamine, 100U/ml penicillin, 100U/ml streptomycin, 0.14%  
422 (w/v) BSA, 5µg/ml TPCK-treated trypsin). Following a 48h incubation at 37°C, 5%CO<sub>2</sub>  
423 supernatants were collected and inoculated into embryonated hens' eggs to grow virus  
424 stocks.

425 **Virus plaque assays**

426 All plaque assays were performed in MDCK cells using 0.6% agarose overlay. Cells were  
427 stained with either 0.1% crystal violet solution (20% methanol). When plaques needed to be  
428 visualised by immunofluorescence, cells were fixed with 10% neutral buffered formalin  
429 followed by permeabilisation with PBS (0.2 %Triton X-100) then incubated with mouse  
430 monoclonal α-NP (Iqbal laboratory, 1:2000). Primary antibody was detected with goat anti-  
431 mouse IgG 568 conjugated secondary antibody (LICOR; 1:10000) Plates were imaged using an  
432 Odyssey Clx Near-Infrared Fluorescence Imaging System (LICOR). ImageJ was used to measure  
433 and analyse plaques.

434

435 **Minireplicon assays**

436 DF-1 cells were seeded into 24 well plates were co-transfected with PB2, PB1, PA and NP,  
437 along with a firefly luciferase reporter construct under an avian poll promoter (CKpPol I Luc)  
438 at the following concentrations: PB2- 160ng, PB1- 160ng, PA- 40ng, NP- 320ng, pPol I Luc-  
439 160ng. 48 hours post-transfection cells were lysed in Passive Lysis Buffer (Promega) and  
440 lysates were read on a Promega GloMax Multi Detection unit using Luciferase Assay Reagent  
441 II (Promega) following the manufacturer's instructions.

442 **Virus replication *in vitro* and *in ovo***

443 MDCK and CK cells were inoculated with virus diluted in serum free DMEM for 1 h at 37°C at  
444 an MOI of 0.01. Cell supernatants were taken at 4-, 8-, 12-, 24-, 48- and 72-hours post-infection.  
445 After 1 hour incubation with virus, cells were then washed twice to remove unbound virus, and  
446 media was replaced with virus growth medium - DMEM plus 2 µg/ml tosyl phenylalanyl  
447 chloromethyl ketone (TPCK)-treated trypsin for MDCK cells or Eagle's minimum essential medium  
448 (EMEM), 7% bovine serum albumin and 10% tryptose phosphate broth for CKCs.. Viruses were  
449 titred by plaque assay on MDCK cells.

450 10-day-old embryonated hens' eggs (VALO breed) were inoculated with 100 pfu of virus  
451 into the allantoic cavity. Eggs were incubated for 4-72h and culled via the schedule one  
452 method of refrigeration at 4°C for a minimum of 6h. Harvested allantoic fluid from each egg  
453 was collected and clarified by centrifugation, virus titres were assessed by plaque assay on  
454 MDCKs.

455

456

457 **Virus infection, transmission and clinical outcome *in vivo***

458 Prior to the commencement of the study, all birds were swabbed (in both oropharyngeal  
459 and cloacal cavities) and bled via wing prick to confirm they were naïve to the virus. All  
460 infection experiments were performed in self-contained BioFlex B50 Rigid Body Poultry  
461 isolators (Bell Isolation Systems) at negative pressure. 20 birds per group were directly  
462 inoculated with  $10^4$  pfu of virus intranasally. Mock infected birds were instead inoculated with  
463 sterile PBS. One day post-inoculation 8 naïve contact birds were introduced into each isolator  
464 to determine virus transmission.

465 Throughout the experiment, birds were swabbed in the buccal and cloacal cavities (days  
466 1-8, 10 and 14 post-infection). Swabs were collected into 1ml of virus transport media (WHO  
467 standard). Swabs were soaked in media and vortexed for 10 seconds before centrifugation.  
468 Viral titres in swabs were determined by plaque assay on MDCKs.

469 At day 1 and 3 post-inoculation, directly infected birds were euthanised and a panel of  
470 tissues were collected and stored in RNA later at  $-80^{\circ}\text{C}$  until further processing. On day 14  
471 post-infection, all remaining birds were culled via overdose of pentobarbital or cervical  
472 dislocation.

473 **RNA extraction and RT-PCR from chicken tissues**

474 30mg of tissue collected in RNA later was mixed with 750 $\mu\text{l}$  of Trizol. One sterile 5mm  
475 stainless steel bead was added per tube and tissues were homogenised using the Retsch MM  
476 300 Bead Mill system (20Hz, 4 min). 200 $\mu\text{l}$  of chloroform was added per tube and tubes were  
477 shaken vigorously and incubated for 5 min at room temperature. Samples were centrifuged  
478 (9,200xg, 30 min,  $4^{\circ}\text{C}$ ) and the top aqueous phase containing total RNA was added to a new

479 microcentrifuge tube and the remaining fluid discarded. RNA extraction was then carried out  
480 using the QIAGEN RNeasy mini kit following manufacturers' instructions.

481 100ng of RNA extracted from tissue samples was used for qRT-PCR. All qRT-PCR was  
482 completed using the Superscript III platinum One step qRT-PCR kit (Life Technologies)  
483 following manufacturer's instructions for reaction set up. Cycling conditions were as follows:  
484 i) 5 min hold step at 50°C, ii) a 2 min hold step at 95°C, and 40 cycles of iii) 3 sec at 95 °C and  
485 iv) 30 sec annealing and extension at 60 °C. Cycle threshold (CT) values were obtained using  
486 7500 software v2.3. Mean CT values were calculated from triplicate data. Within viral M  
487 segment qRT-PCR an M segment RNA standard curve was completed alongside the samples  
488 to quantify the amount of M gene RNA within the sample from the CT value. T7 RNA  
489 polymerase-derived transcripts from UDL-01 segment 7 were used for the preparation of the  
490 standard curve.

#### 491 **Host shutoff assays**

492  $\beta$ -galactosidase ( $\beta$ -gal) shutoff reporter assays were performed as previously described  
493 [19]. Briefly, 293T or DF-1 cells were co-transfected with expression plasmids for the influenza  
494 segment 3 and  $\beta$ -gal reporter. 48 hours later, cells were lysed with Reporter lysis buffer  
495 (Promega).  $\beta$ -gal expression was measured using the  $\beta$ -galactosidase enzyme assay system  
496 (Promega). A Promega GloMax Multi Detection unit was employed to read absorbance at  
497 420nm.

498 For the radio-labelling shutoff activity assays using live virus, chicken embryonic  
499 fibroblast (CEFs) were infected with 7:1 (PR8: H9N2) reassortant viruses containing the  
500 described PAs at an MOI of 3. At 6 hours post-infection, cells were washed and overlaid with

501 1ml of methionine-and cysteine- free DMEM supplemented with 5% dialysed FCS and 2mM  
502 L-Glutamine to starve the cells of methionine and cysteine. At 8 hours post-infection, cells  
503 were washed and overlaid with methionine- and cysteine- free DMEM (supplemented as  
504 above) including <sup>35</sup>S-methionine/cysteine protein labelling mix (Perkin/Elmer) at 0.8mBq/ml.  
505 Cells were incubated at 37°C in a vented box containing activated charcoal (Fisher) for 1 hour.  
506 Cells were washed once with ice-cold PBS and then cells lysed in protein loading buffer for  
507 SDS-PAGE and processed via autoradiography. Gels were fixed in gel fix solution (50%  
508 methanol, 10% acetic acid) for 5-15 minutes. Fix solution was replaced for 2 more rounds of  
509 fixing. Gels were dried in a gel dryer (Bio-Rad) by heating up to 80°C for 2-4h under vacuum  
510 pressure. Dried gels were placed in a sealed cassette with an X-ray film (Thermo Fisher)  
511 overnight, at a minimum or until the desired signal strength was achieved. X-ray films were  
512 developed using a Konica SRX-101A X-ograph film processor using manufacturers'  
513 instructions.

514 For the non-radioactive shutoff activity assays using live virus, MDCKs were infected with  
515 whole H9N2 virus at an MOI of 5. At 7.5 hours post-infection cells were washed and the  
516 medium changed to complete DMEM containing 10µg/ml of Puromycin dihydrochloride from  
517 *Streptomyces alboniger* for 30 minutes. Cells were washed then lysed in protein loading buffer  
518 for SDS-PAGE and western blotted, probing for puromycin. Puromycylated protein synthesis  
519 was quantified in the region of the gel between 45kDa and 80kDa.

520 Protein quantification following autoradiography or anti-puromycin western blot was  
521 determined by densitometry using ImageJ analysis software.

522



## 523 **Bioinformatics analysis**

524 To assess the prevalence of different polymorphisms at position 26 of PA, every amino  
525 acid sequence of full length PA isolates from avian hosts, excluding duplicate sequences, was  
526 downloaded from the NCBI Influenza Virus Database  
527 (<https://www.ncbi.nlm.nih.gov/genomes/FLU/Database/nph-select.cgi>), as of the 23<sup>rd</sup> May,  
528 2020. Sequences were aligned using Geneious R11.1.5 and the distribution of different amino  
529 acids was recorded.

## 530 **Statistical analysis**

531 All statistical analysis was carried out using GraphPad Prism 6/7 software. Distribution of  
532 data was assessed prior to deciding on the statistical test to use.

## 533 **Funding information**

534 This study was funded by the UK Research and Innovation (UKRI), Biotechnology and  
535 Biological Sciences Research Council (BBSRC) grants: BBS/E/I/00001981, BB/P016472/1,  
536 BBS/E/I/00007030, BBS/E/I/00007031, BBS/E/I/00007035, BBS/E/I/00007036,  
537 BB/P013740/1, Zoonoses and Emerging Livestock systems (ZELS) (BB/L018853/1 and  
538 BB/S013792/1), the GCRF One Health Poultry Hub (BB/S011269/1), UK-China-Philippines-  
539 Thailand Swine and Poultry Research Initiative (BB/R012679/1), as well as the Medical  
540 Research Council grant: No. MR/M011747/1. The funders had no role in study design, data  
541 collection and interpretation, or the decision to submit the work for publication.

542

## 543        **Acknowledgments**

544        We would like to thank the animal housing staff for looking after the wellbeing of  
545        chickens used in this study and for monitoring their health throughout the experiments.

## 546        **References**

- 547        1. Sun Y, Qin K, Wang J, Pu J, Tang Q, Hu Y, et al. High genetic compatibility and increased  
548        pathogenicity of reassortants derived from avian H9N2 and pandemic H1N1/2009  
549        influenza viruses. *Proceedings of the National Academy of Sciences*. 2011;108(10):4164-  
550        9.
- 551        2. Villa M, Lässig M. Fitness cost of reassortment in human influenza. *PLoS pathogens*.  
552        2017;13(11).
- 553        3. Sealy JE, Fournie G, Trang PH, Dang NH, Sadeyen JR, Thanh TL, et al. Poultry trading  
554        behaviours in Vietnamese live bird markets as risk factors for avian influenza infection in  
555        chickens. *Transboundary and emerging diseases*. 2019;66(6):2507-16.
- 556        4. Zecchin B, Minoungou G, Fusaro A, Moctar S, Ouedraogo-Kaboré A, Schivo A, et al.  
557        Influenza A (H9N2) virus, Burkina Faso. *Emerging infectious diseases*. 2017;23(12):2118.
- 558        5. Dalby AR, Iqbal M. A global phylogenetic analysis in order to determine the host species  
559        and geography dependent features present in the evolution of avian H9N2 influenza  
560        hemagglutinin. *PeerJ*. 2014;2:e655.
- 561        6. Peacock THP, James J, Sealy JE, Iqbal M. A Global Perspective on H9N2 Avian Influenza  
562        Virus. *Viruses*. 2019;11(7). Epub 2019/07/10. doi: 10.3390/v11070620. PubMed PMID:  
563        31284485; PubMed Central PMCID: PMC6669617.
- 564        7. Otte J, Hinrichs J, Rushton J, Roland-Holst D, Zilberman D. Impacts of avian influenza virus  
565        on animal production in developing countries. *CAB Reviews: Perspectives in Agriculture,*  
566        *Veterinary Science, Nutrition and Natural Resources*. 2008;3(080):18.
- 567        8. Pan Q, Liu A, Zhang F, Ling Y, Ou C, Hou N, et al. Co-infection of broilers with  
568        *Ornithobacterium rhinotracheale* and H9N2 avian influenza virus. *BMC veterinary*  
569        *research*. 2012;8(1):104.

- 570 9. Nili H, Asasi K. Natural cases and an experimental study of H9N2 avian influenza in  
571 commercial broiler chickens of Iran. *Avian Pathology*. 2002;31(3):247-52.
- 572 10. Dong G, Xu C, Wang C, Wu B, Luo J, Zhang H, et al. Reassortant H9N2 influenza viruses  
573 containing H5N1-like PB1 genes isolated from black-billed magpies in Southern China.  
574 *PloS one*. 2011;6(9).
- 575 11. Lam TT-Y, Wang J, Shen Y, Zhou B, Duan L, Cheung C-L, et al. The genesis and source of  
576 the H7N9 influenza viruses causing human infections in China. *Nature*.  
577 2013;502(7470):241-4.
- 578 12. Liu D, Shi W, Shi Y, Wang D, Xiao H, Li W, et al. Origin and diversity of novel avian influenza  
579 A H7N9 viruses causing human infection: phylogenetic, structural, and coalescent  
580 analyses. *The Lancet*. 2013;381(9881):1926-32.
- 581 13. Iqbal M, Yaqub T, Reddy K, McCauley JW. Novel genotypes of H9N2 influenza A viruses  
582 isolated from poultry in Pakistan containing NS genes similar to highly pathogenic H7N3  
583 and H5N1 viruses. *PloS one*. 2009;4(6).
- 584 14. Iqbal M, Yaqub T, Mukhtar N, Shabbir MZ, McCauley JW. Infectivity and transmissibility  
585 of H9N2 avian influenza virus in chickens and wild terrestrial birds. *Veterinary research*.  
586 2013;44(1):100.
- 587 15. Guo Y, Krauss S, Senne D, Mo I, Lo K, Xiong X, et al. Characterization of the pathogenicity  
588 of members of the newly established H9N2 influenza virus lineages in Asia. *Virology*.  
589 2000;267(2):279-88.
- 590 16. Seiler P, Kercher L, Feeroz MM, Shanmuganatham K, Jones-Engel L, Turner J, et al. H9N2  
591 influenza viruses from Bangladesh: Transmission in chicken and New World quail.  
592 *Influenza and other respiratory viruses*. 2018;12(6):814-7.
- 593 17. Hara K, Schmidt FI, Crow M, Brownlee GG. Amino acid residues in the N-terminal region  
594 of the PA subunit of influenza A virus RNA polymerase play a critical role in protein  
595 stability, endonuclease activity, cap binding, and virion RNA promoter binding. *J Virol*.  
596 2006;80(16):7789-98. Epub 2006/07/29. doi: 10.1128/JVI.00600-06. PubMed PMID:  
597 16873236; PubMed Central PMCID: PMCPMC1563815.
- 598 18. Te Velhuis AJ, Fodor E. Influenza virus RNA polymerase: insights into the mechanisms of  
599 viral RNA synthesis. *Nat Rev Microbiol*. 2016;14(8):479-93. Epub 2016/07/12. doi:  
600 10.1038/nrmicro.2016.87. PubMed PMID: 27396566; PubMed Central PMCID:  
601 PMCPMC4966622.

- 602 19. Jagger BW, Wise HM, Kash JC, Walters KA, Wills NM, Xiao YL, et al. An overlapping  
603 protein-coding region in influenza A virus segment 3 modulates the host response.  
604 Science. 2012;337(6091):199-204. Epub 2012/06/30. doi: 10.1126/science.1222213.  
605 PubMed PMID: 22745253; PubMed Central PMCID: PMC3552242.
- 606 20. Firth AE, Jagger BW, Wise HM, Nelson CC, Parsawar K, Wills NM, et al. Ribosomal  
607 frameshifting used in influenza A virus expression occurs within the sequence  
608 UCC\_UUU\_CGU and is in the +1 direction. Open Biol. 2012;2(10):120109. Epub  
609 2012/11/17. doi: 10.1098/rsob.120109. PubMed PMID: 23155484; PubMed Central  
610 PMCID: PMC3498833.
- 611 21. Gaucherand L, Porter BK, Levene RE, Price EL, Schmaling SK, Rycroft CH, et al. The  
612 Influenza A Virus Endoribonuclease PA-X Usurps Host mRNA Processing Machinery to  
613 Limit Host Gene Expression. Cell Rep. 2019;27(3):776-92 e7. Epub 2019/04/18. doi:  
614 10.1016/j.celrep.2019.03.063. PubMed PMID: 30995476; PubMed Central PMCID:  
615 PMC6499400.
- 616 22. Gao H, Sun H, Hu J, Qi L, Wang J, Xiong X, et al. Twenty amino acids at the C-terminus of  
617 PA-X are associated with increased influenza A virus replication and pathogenicity. J Gen  
618 Virol. 2015;96(8):2036-49. Epub 2015/04/17. doi: 10.1099/vir.0.000143. PubMed PMID:  
619 25877935; PubMed Central PMCID: PMC4681059.
- 620 23. Gao H, Sun Y, Hu J, Qi L, Wang J, Xiong X, et al. The contribution of PA-X to the virulence  
621 of pandemic 2009 H1N1 and highly pathogenic H5N1 avian influenza viruses. Sci Rep.  
622 2015;5:8262. Epub 2015/02/06. doi: 10.1038/srep08262. PubMed PMID: 25652161;  
623 PubMed Central PMCID: PMC4317690.
- 624 24. Gao H, Xu G, Sun Y, Qi L, Wang J, Kong W, et al. PA-X is a virulence factor in avian H9N2  
625 influenza virus. J Gen Virol. 2015;96(9):2587-94. Epub 2015/08/25. doi:  
626 10.1099/jgv.0.000232. PubMed PMID: 26296365.
- 627 25. Hu J, Mo Y, Wang X, Gu M, Hu Z, Zhong L, et al. PA-X decreases the pathogenicity of highly  
628 pathogenic H5N1 influenza A virus in avian species by inhibiting virus replication and host  
629 response. J Virol. 2015;89(8):4126-42. Epub 2015/01/30. doi: 10.1128/JVI.02132-14.  
630 PubMed PMID: 25631083; PubMed Central PMCID: PMC4442343.
- 631 26. Sun Y, Hu Z, Zhang X, Chen M, Wang Z, Xu G, et al. R195K mutation in the PA-X protein  
632 increases the virulence and transmission of influenza A virus in mammalian hosts. J Virol.  
633 2020. Epub 2020/03/13. doi: 10.1128/JVI.01817-19. PubMed PMID: 32161172.

- 634 27. Pflug A, Guilligay D, Reich S, Cusack S. Structure of influenza A polymerase bound to the  
635 viral RNA promoter. *Nature*. 2014;516(7531):355-60. Epub 2014/11/20. doi:  
636 10.1038/nature14008. PubMed PMID: 25409142.
- 637 28. Hu J, Hu Z, Mo Y, Wu Q, Cui Z, Duan Z, et al. The PA and HA gene-mediated high viral load  
638 and intense innate immune response in the brain contribute to the high pathogenicity of  
639 H5N1 avian influenza virus in mallard ducks. *J Virol*. 2013;87(20):11063-75. Epub  
640 2013/08/09. doi: 10.1128/JVI.00760-13. PubMed PMID: 23926340; PubMed Central  
641 PMCID: PMC3807287.
- 642 29. Mehle A, Dugan VG, Taubenberger JK, Doudna JA. Reassortment and mutation of the  
643 avian influenza virus polymerase PA subunit overcome species barriers. *J Virol*.  
644 2012;86(3):1750-7. Epub 2011/11/18. doi: 10.1128/JVI.06203-11. PubMed PMID:  
645 22090127; PubMed Central PMCID: PMC3264373.
- 646 30. James J, Howard W, Iqbal M, Nair VK, Barclay WS, Shelton H. Influenza A virus PB1-F2  
647 protein prolongs viral shedding in chickens lengthening the transmission window. *The*  
648 *Journal of general virology*. 2016;97(10):2516.
- 649 31. Swayne DE, Beck JR. Experimental study to determine if low-pathogenicity and high-  
650 pathogenicity avian influenza viruses can be present in chicken breast and thigh meat  
651 following intranasal virus inoculation. *Avian diseases*. 2005;49(1):81-5.
- 652 32. Van der Goot J, De Jong M, Koch G, Van Boven M. Comparison of the transmission  
653 characteristics of low and high pathogenicity avian influenza A virus (H5N2).  
654 *Epidemiology & Infection*. 2003;131(2):1003-13.
- 655 33. Peacock TP, Benton DJ, James J, Sadeyen J-R, Chang P, Sealy JE, et al. Immune escape  
656 variants of H9N2 influenza viruses containing deletions at the hemagglutinin receptor  
657 binding site retain fitness in vivo and display enhanced zoonotic characteristics. *Journal*  
658 *of virology*. 2017;91(14):e00218-17.
- 659 34. Clements AL, Peacock TP, Sealy JE, Hussain S, Sadeyen J-R, Shelton H, et al. PA-X is an  
660 avian virulence factor in H9N2 avian influenza virus. *bioRxiv*. 2020:2020.05.25.114876.  
661 doi: 10.1101/2020.05.25.114876.
- 662 35. Hussain S, Turnbull ML, Wise HM, Jagger BW, Beard PM, Kovacikova K, et al. Mutation of  
663 Influenza A Virus PA-X Decreases Pathogenicity in Chicken Embryos and Can Increase the  
664 Yield of Reassortant Candidate Vaccine Viruses. *J Virol*. 2019;93(2). Epub 2018/11/02.

- 665 doi: 10.1128/JVI.01551-18. PubMed PMID: 30381488; PubMed Central PMCID:  
666 PMCPMC6321911.
- 667 36. Liao Y, Gu F, Mao X, Niu Q, Wang H, Sun Y, et al. Regulation of de novo translation of host  
668 cells by manipulation of PERK/PKR and GADD34-PP1 activity during Newcastle disease  
669 virus infection. *J Gen Virol.* 2016;97(4):867-79. Epub 2016/02/13. doi:  
670 10.1099/jgv.0.000426. PubMed PMID: 26869028.
- 671 37. Desmet EA, Bussey KA, Stone R, Takimoto T. Identification of the N-terminal domain of  
672 the influenza virus PA responsible for the suppression of host protein synthesis. *J Virol.*  
673 2013;87(6):3108-18. Epub 2013/01/04. doi: 10.1128/JVI.02826-12. PubMed PMID:  
674 23283952; PubMed Central PMCID: PMCPMC3592176.
- 675 38. Oishi K, Yamayoshi S, Kawaoka Y. Mapping of a region of the PA-X protein of influenza A  
676 virus that is important for its shutoff activity. *Journal of virology.* 2015;89(16):8661-5.
- 677 39. Muramoto Y, Noda T, Kawakami E, Akkina R, Kawaoka Y. Identification of novel influenza  
678 A virus proteins translated from PA mRNA. *J Virol.* 2013;87(5):2455-62. Epub 2012/12/14.  
679 doi: 10.1128/JVI.02656-12. PubMed PMID: 23236060; PubMed Central PMCID:  
680 PMCPMC3571384.
- 681 40. Wan H, Sorrell EM, Song H, Hossain MJ, Ramirez-Nieto G, Monne I, et al. Replication and  
682 transmission of H9N2 influenza viruses in ferrets: evaluation of pandemic potential. *PLoS*  
683 *One.* 2008;3(8):e2923. Epub 2008/08/14. doi: 10.1371/journal.pone.0002923. PubMed  
684 PMID: 18698430; PubMed Central PMCID: PMCPMC2500216.
- 685 41. Obadan AO, Santos J, Ferreri L, Thompson AJ, Carnaccini S, Geiger G, et al. Flexibility In  
686 Vitro of Amino Acid 226 in the Receptor-Binding Site of an H9 Subtype Influenza A Virus  
687 and Its Effect In Vivo on Virus Replication, Tropism, and Transmission. *J Virol.* 2019;93(6).  
688 Epub 2018/12/21. doi: 10.1128/JVI.02011-18. PubMed PMID: 30567980; PubMed  
689 Central PMCID: PMCPMC6401463.
- 690 42. Hennion RM, Hill G. The preparation of chicken kidney cell cultures for virus propagation.  
691 *Methods Mol Biol.* 2015;1282:57-62. Epub 2015/02/28. doi: 10.1007/978-1-4939-2438-  
692 7\_6. PubMed PMID: 25720471; PubMed Central PMCID: PMCPMC7122669.
- 693 43. Hoffmann E, Neumann G, Kawaoka Y, Hobom G, Webster RG. A DNA transfection system  
694 for generation of influenza A virus from eight plasmids. *Proceedings of the National*  
695 *Academy of Sciences.* 2000;97(11):6108-13.

696 44. Long JS, Giotis ES, Moncorge O, Frise R, Mistry B, James J, et al. Species difference in  
697 ANP32A underlies influenza A virus polymerase host restriction. *Nature*.  
698 2016;529(7584):101-4. doi: 10.1038/nature16474. PubMed PMID: 26738596; PubMed  
699 Central PMCID: PMC4710677.

700

701 **Table 1: Amino acid differences between the N-terminus of progenitor (WF10) and**  
702 **reassortant (UDL-01) H9N2 segment 3 products.**

| Amino acid position | WF10 | UDL-01 | Domain       |
|---------------------|------|--------|--------------|
| 3                   | D    | N      | Endo         |
| 20                  | T    | A      | Endo         |
| 26                  | K    | E      | Endo         |
| 85                  | A    | T      | Endo         |
| 86                  | M    | L      | Endo         |
| 100                 | V    | I      | Endo         |
| 101                 | D    | E      | Endo         |
| 118                 | T    | I      | Endo         |
| 160                 | D    | E      | Endo         |
| 184                 | S    | N      | Endo         |
| 213                 | R    | K      | Linker       |
| 237                 | K    | E      | Linker       |
| 316                 | D    | G      | PA-C         |
| 318                 | R    | K      | PA-C         |
| 319                 | E    | D      | PA-C         |
| 323                 | I    | V      | PA-C         |
| 327                 | E    | K      | PA-C         |
| 335                 | I    | L      | PA-C         |
| 352                 | D    | E      | PA-C         |
| 367                 | M    | K      | PA-C         |
| X-221               | L    | R      | X-ORF (PA-X) |
| X-250               | R    | Q      | X-ORF (PA-X) |

703

704

705

706

707

708

709

710

711

712

713

714

**Table 2. Prevalence of PA residue 26 polymorphisms in avian influenza viruses.**

| <b>Viruses</b>              | <b>Glutamic acid (%)</b> | <b>Lysine (%)</b> | <b>Other (%)</b>                                       |
|-----------------------------|--------------------------|-------------------|--------------------------------------------------------|
| All avian influenza viruses | 99.92                    | 0.02              | 0.04 (glycine), 0.01 (aspartic acid), 0.01 (glutamine) |
| H5Nx                        | 99.73                    | 0.03              | 0.07 (glycine), 0.11 (aspartic acid), 0.03 (glutamine) |
| H7Nx                        | 99.92                    | 0.00              | 0.08 (glycine)                                         |
| H9Nx                        | 99.87                    | 0.13              | 0.00                                                   |

715

716

717

718

719

720

721

722

723

724

725

726

727

728

729



730

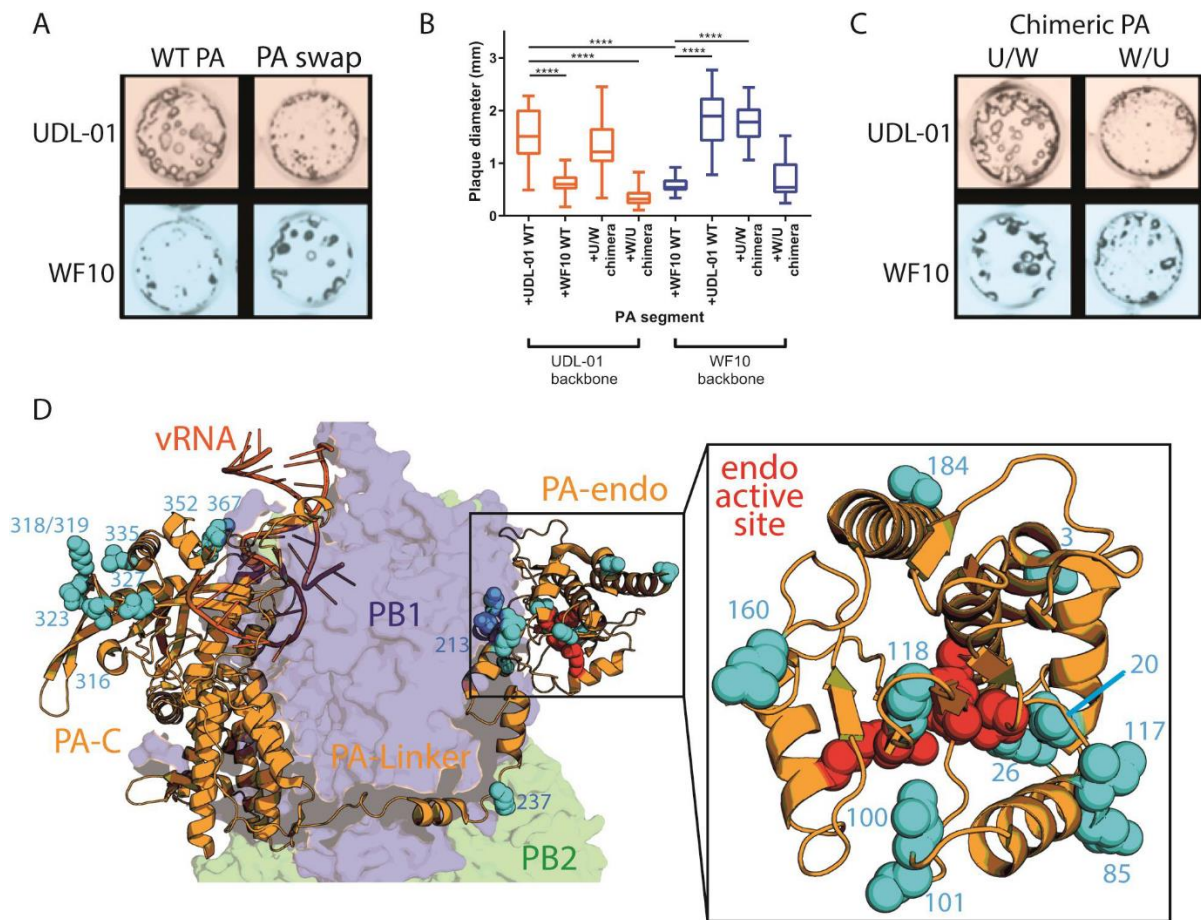

731

732 **Figure 1. The small plaque phenotype of WF10 maps to the N-terminus of segment 3.** The  
 733 indicated viruses were titrated in MDCK cells via plaque assay under a 0.6% agarose overlay  
 734 and 72 h.p.i., fixed and stained for NP using immunofluorescence. (A) and (C) show  
 735 representative images of plaque sizes of UDL-01 and WF10 RG viruses. (B) shows diameter of  
 736 20 plaques/virus measured using Image J analysis software. The graphs represent the average  
 737 plaque diameter +/- SD. (B) Kruskal-Wallis with Dunn's multiple comparison test was used to  
 738 determine the statistical differences between the plaque sizes. \*\*\*\* P value < 0.0001 (D)  
 739 Structure of the trimeric polymerase with vRNA (dark orange) with PB2 (green), PB1 (blue)  
 740 and PA (light orange). N-terminus half PA differences between WF10 and UDL-01 shown in  
 741 cyan, zoomed in PA endonuclease domain included in right panel, PA endonuclease active set  
 742 residues H41, E80, D108, E119 and K134 shown in red (PDB ID: 4WSB)[27].

743

744

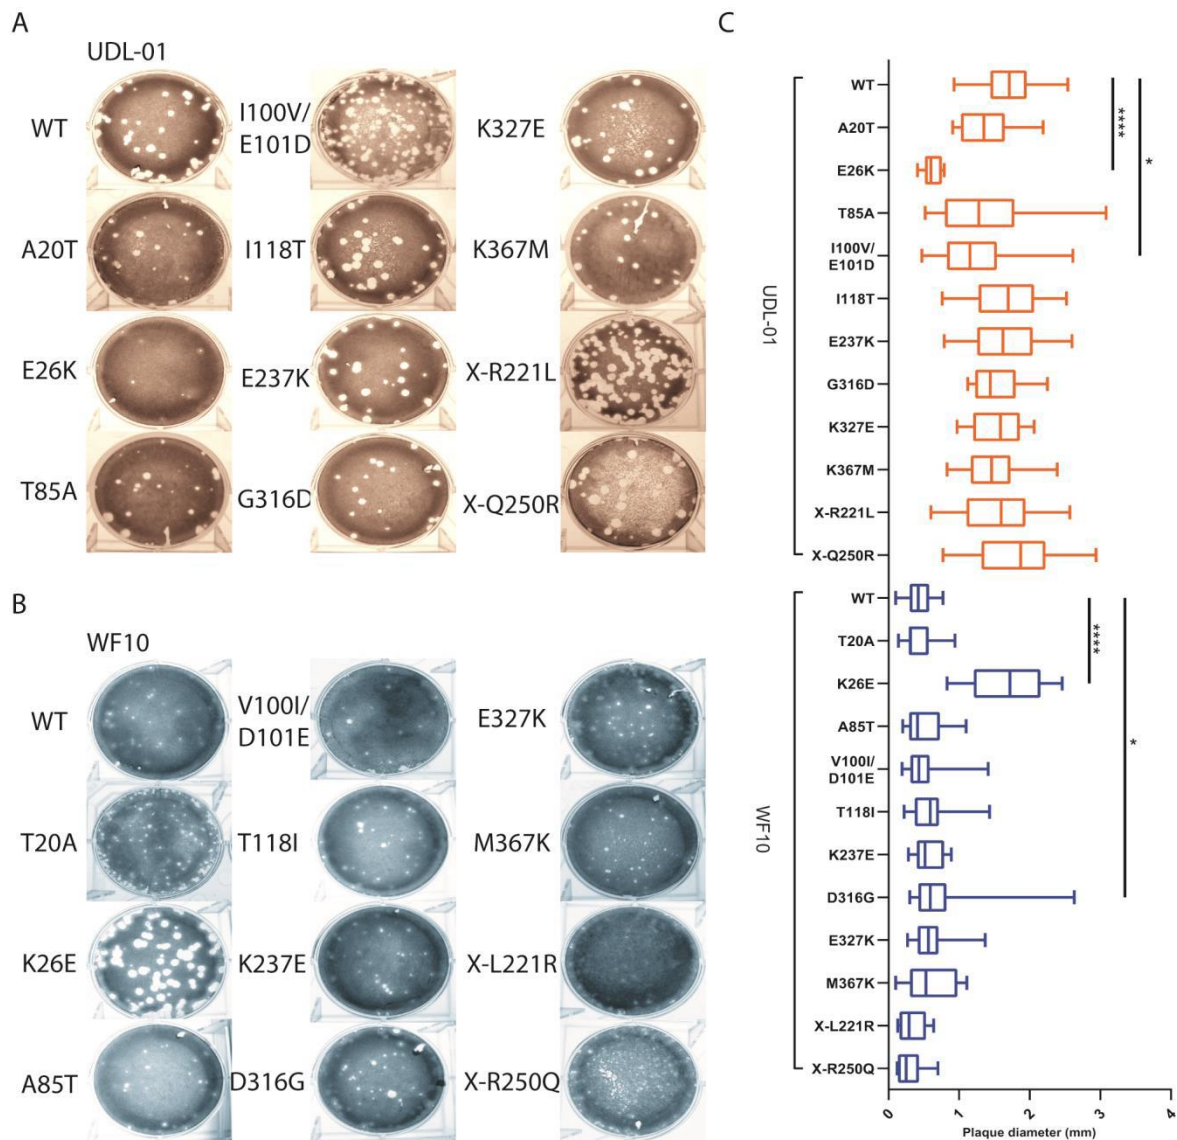

745

746 **Figure 2. The small plaque phenotype of WF10 maps to PA position 26.** H9N2 AIVs with  
 747 either a UDL-01 or WF10 backbone were rescued via reverse genetics. The plaque phenotypes  
 748 of the rescues were assessed via plaque assay on MDCK cells under a 0.6% agarose overlay.  
 749 After 72 hours cells were fixed and stained with 0.1% crystal violet solution and plaques  
 750 imaged. (A) Visual representation of UDL-01 virus panel containing PA mutations to make  
 751 them WF10-like. (B) Visual representation of WF10 virus panel containing PA mutations to  
 752 make them UDL-01 like. (C) 20 plaque diameters per virus performed on the same day were  
 753 measured using ImageJ analysis software and the average plaque diameter calculated. Graph  
 754 represents the average +/- SD. P values= \*\*\*\*: <0.0001; \*\*: <0.0039 (Kruskal-Wallis with  
 755 Dunn's multiple comparisons).

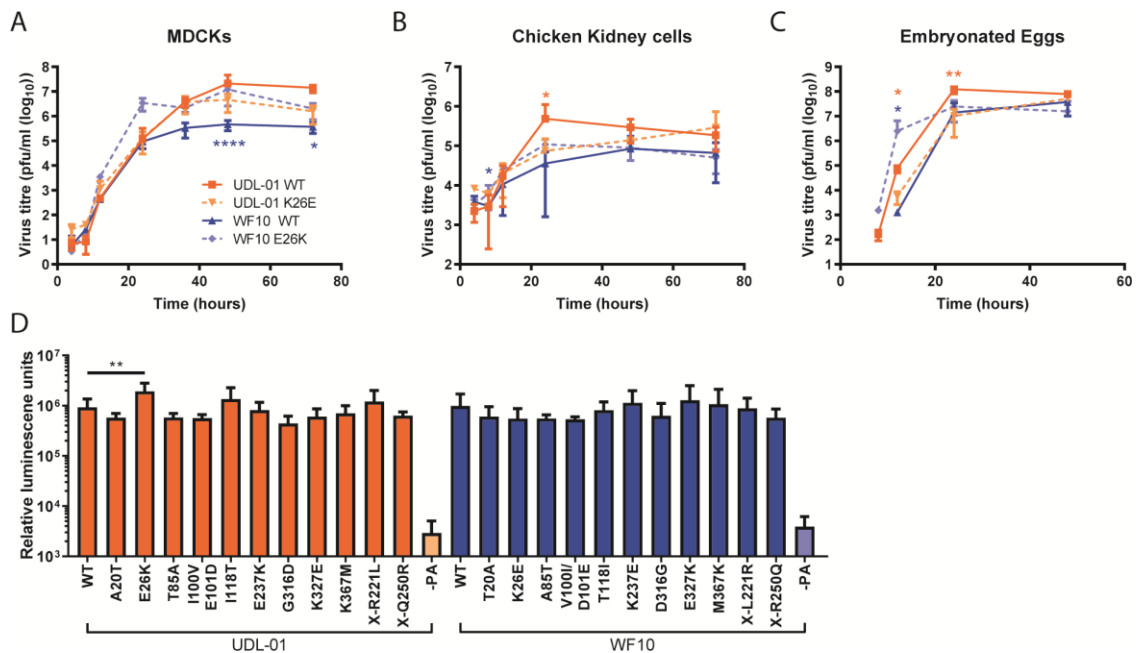

756

757 **Figure 3. Variation at position 26 leads to differences in replication but not polymerase**

758 **activity.** (A) MDCK cells and (B) CK cells were infected with the specified virus (UDL-01 WT,

759 UDL-01 E26K, WF10 WT or WF10 K26E) at a low MOI (0.01). (C) 10-day-old fertilised hens'

760 eggs infected with 100pfu of virus. Samples were taken at the indicated time points for

761 titration via plaque assay. No virus was detected prior to 8 h.p.i. Data represents the average

762 +/- SD of 3 independent experiments (cells) or 5 eggs per timepoint. Significant differences

763 (unpaired T-tests (A; UDL-01 36 and 72 h.p.i. WF10 24, 36, 48 and 72 h.p.i., B: UDL-01 8, 12,

764 24 and 48 h.p.i. WF10 8, 48 and h.p.i. C: UDL-01 12 h.p.i.) or Mann-Whitney Test: (A; UDL-01

765 4, 8, 12, 24 and 48 h.p.i. WF10 4, 8 and 12 h.p.i. B; UDL-01 4 and 72 h.p.i. and WF10 4, 12

766 and 72 h.p.i. C: UDL-01 8, 24 and 48 h.p.i. WF10 all data points) between WT and

767 corresponding mutant at each time point depending on distribution of data are represented

768 via with asterisks in orange (UDL-01 pair) or blue (WF10 pair). P values: \* = <0.035; \*\* =

769 <0.008; \*\*\*\* = <0.0001. (D) Polymerase activity of the different mutants was assessed using

770 an influenza minireplicon assay. DF-1 cells were transfected with the components of the

771 polymerase complex (PB1, PB2, PA and NP) plus a vRNA mimic encoding luciferase under the

772 control of an avian RNA polymerase I promotor. 48 hours post transfection cells were lysed

773 and luciferase levels measured. Data represents the mean +/- SD of 3 independent

774 experiments.

775

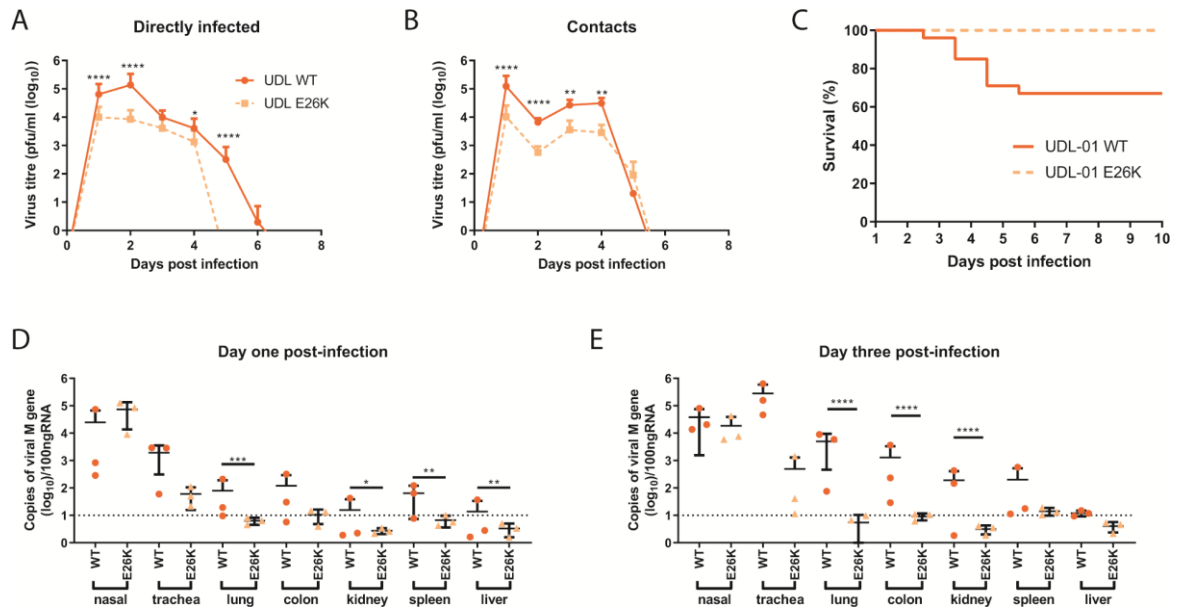

776

777

**Figure 4. In the background of UDL-01, K26E leads to reduced shedding, mortality and**

778

**tissue tropism.** Groups of 20 chickens were infected with  $10^4$ pfu of either UDL-01 WT or

779

mutant UDL-01 E26K viruses. One day post-infection 8 naïve contact birds were cohoused

780

with each group. Birds were swabbed in the buccal and cloacal cavities throughout the study

781

duration. (A, B) average buccal shedding profile of directly infected or contact birds. (C)

782

Survival curve of birds exposed to each virus, graph includes both birds that died

783

spontaneously or which reached a humane end point (D, E) qRT-PCR for detection of M gene

784

of viral RNA from chicken tissues of birds culled on day 1 and 3 post-infection. Mann-Whitney

785

Test was conducted for A and B. For D and E, unpaired T-test (Day 1- Trachea, Kidney, Spleen

786

and Liver, Day 3- Nasal, Trachea, Colon, Kidney, Spleen) or Mann Whitney Tests (Day 1- Lung

787

and Colon, Day 3- Lung and Liver) between UDL-01 WT and UDL-01 E26K infected birds was

788

conducted. P values = \*\*\*\*:<0.001, \*\*\*: <0.0005, \*\*: <0.0082, \*:<0.033. Error bars represent

789

+/- SD of all birds swabbed (at least 4 birds/group). For survival curves (E) P value = <0.0001

790

(Log rank (Mantel-Cox) test).

791

792

793

794

795

796

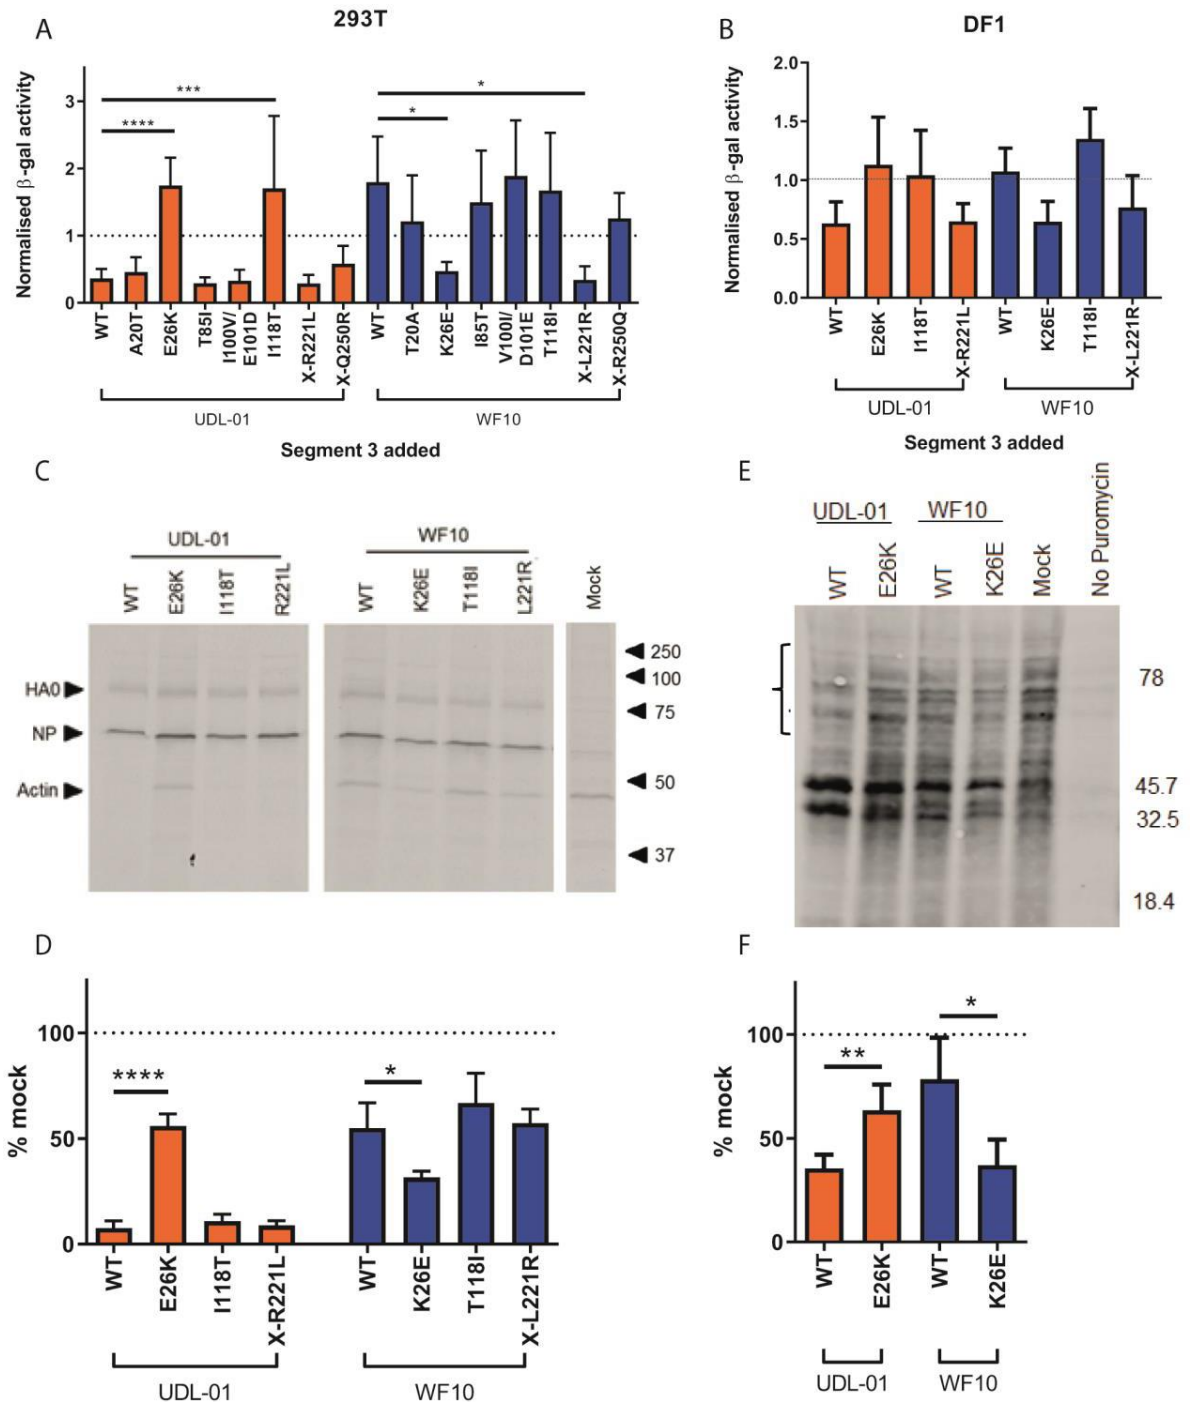

797

798

799

800

801

802

803

804

**Figure 5. Lysine at position 26 correlates with a lack of host shutoff activity in PA-X.** WT

or mutant segment 3 plasmids were co-transfected into (A) 293T cells or (B) DF-1 cells with a

$\beta$ -gal reporter plasmid. 48 hours post-transfection cells were lysed and levels of  $\beta$ -gal assessed

by colorimetric enzyme assay. Results were normalised to a sample where the PA plasmid

was replaced with the empty vector control. Graph represents the average of 3 independent

experiments +/- SD. P values: \*\*\*\*= <0.0001; \*\*\*= 0.0003; \* = <0.003 (A, B) one-way ANOVA

with multiple comparisons (all 293T and WF10 panel in DF-1) or Kruskal Wallis with multiple

805 comparisons (UDL-01 panel in DF-1). (C, D) CEF were infected with a high MOI (3) of virus. 7  
806 hours post-infection cells were pulsed with 35-S methionine for 1 hour then lysed and  
807 proteins separated by SDS-PAGE. Radiolabelled proteins were detected by autoradiography.  
808 (C) Representative SDS-PAGE gel with specific proteins and the positions of molecular mass  
809 (kDa) markers indicated. (D) Levels of radiolabelled actin were quantified by densitometry  
810 using ImageJ analysis software. Graph represents the average of 3 independent experiments  
811 +/- SD P values = \*: 0.02, \*\*\*\*: <0.0001 (one-way ANOVA with multiple comparisons). (E, F)  
812 MDCK cells were infected with a high MOI (10) of each virus. 7.5 hours post-infection cells  
813 were pulsed with puromycin for 30 minutes. Cells were lysed, run on SDS-PAGE gels and  
814 western blotted for puromycin. (E) Representative western blot gel probed for puromycin. (F)  
815 The bracket in (E) covering the areas above 45.7kDa indicates the region quantified using  
816 ImageJ analysis software to measure the area under the curve following densitometry of this  
817 region. Data were converted to a percentage of the value seen in mock infected cells. Graph  
818 represents average +/- SD of 3 independent experiments. P values = \*: 0.0124, \*\*: 0.007  
819 (unpaired T-test).

820

821

822

823

824

825

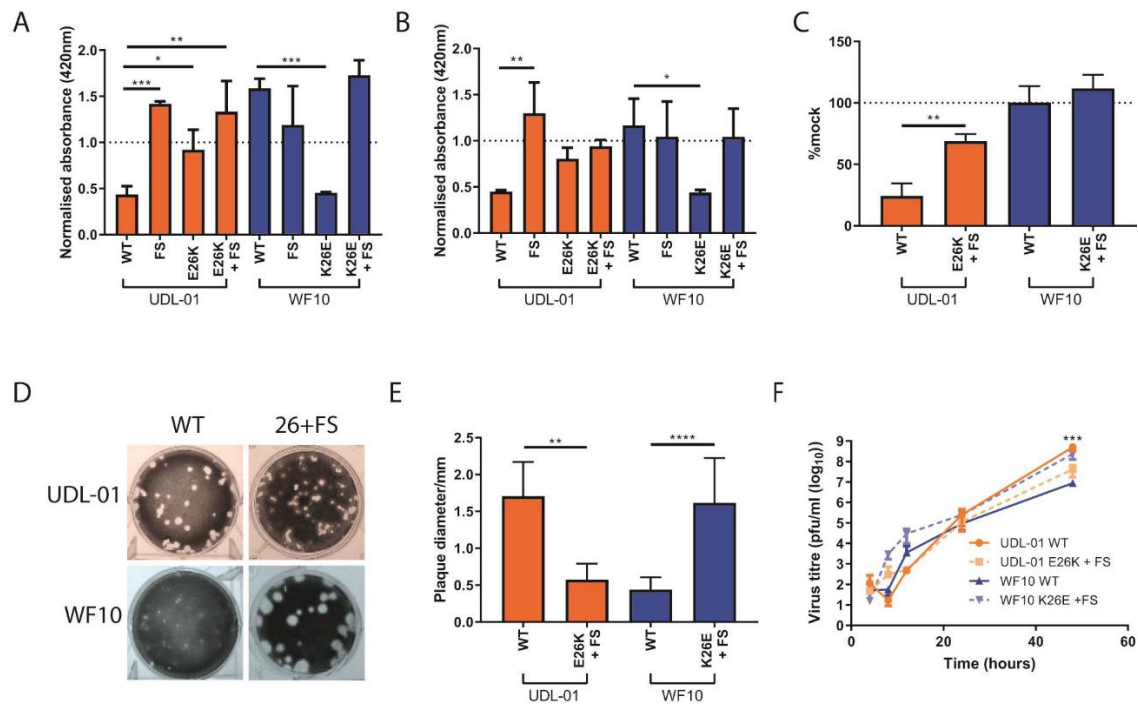

826

827

**Figure 6. The attenuated replication of WF10 is independent of PA-X expression. H9N2**

828 segment 3s with differing mutations were transfected into (A) 293T cells or (B) DF-1 cells along

829 with a  $\beta$ -galactosidase ( $\beta$ -gal) reporter plasmid. 48 hours post transfection cells were lysed

830 and then levels of  $\beta$ -gal assessed by colorimetric enzyme assay. Results were normalised to

831 an empty vector control where no shut off host gene expression was expected. Graph

832 represents the average of 3 independent experiments +/- SD., P values: \*\*\*\*= 0.0001; \*\*=

833 <0.0097 \* = <0.045 (one-way ANOVA – 293T all and DF-1 WF10 panel or Kruskal Wallis – DF-

834 1 UDL-01 panel with multiple comparisons). (C) Host cell shut off within viral infection was

835 then assessed, MDCK cells were infected with each virus at a high MOI (5). 7 hours post-

836 infection cells were pulsed with puromycin for 30 minutes. Cells were lysed in SDS-PAGE

837 buffer and western blotted for puromycin. The area under the curve for each section was

838 calculated and then compared to the mock infected sample. The Graph displays average +/-

839 SD of 3 independent experiments. P values = \*\*: 0.0042 (unpaired T-test). (D,E) The plaque

840 phenotype of viruses containing both polymorphisms at position 26 and a PA-X frameshift

841 mutation was assessed. Viral plaque phenotypes were assessed in MDCK cells under 0.6%

842 agarose. 48 hours post-infection cells were fixed and stained with 0.1% crystal violet solution

843 and (D) plaques imaged. (E) ImageJ analysis software was used to measure the diameters of

844 20 plaques per virus. Graph represents average +/- SD. P values = \*\*:0.0015, \*\*\*\*=<0.0001

845 (unpaired T-test). (F) MDCK cells were infected with a low MOI of virus (0.01), cell

846 supernatants were harvested at various time points post- infection and viral titres determined  
847 via plaque assay. Graph represents the average of 3 independent experiments +/- SD. P values  
848 =, \*\*\*= 0.006 (unpaired T-test – UDL-01 4 and 24 h.p.i. WF10 8, 12, 24, 48 h.p.i. or Mann  
849 Whitney – UDL-01 8, 12 and 48 h.p.i. WF10 4 h.p.i.). \*\*\* = between WF10 WT and WF10 K26E  
850 +FS.

851
